# Supplementary material for: Intramolecular cyclization of long-chain hyperbranched polymers (HyperMacs) from A2 + Bn step-wise polymerization
Source: Royal Society of Chemistry journal article supplement (doi:10.1039/c6py00986g), 2016-01-01
Supplement: c6py00986g1.pdf [file c6py00986g1.pdf]

Supporting Information for

# **Intramolecular Cyclization of Long-chain Hyperbranched Polymers (HyperMacs) from $A_2+B_n$ Step-wise Polymerization**

Qingfu Ban and Jie Kong\*

MOE Key Laboratory of Space Applied Physics and Chemistry, Shaanxi Key Laboratory of Macromolecular Science and Technology, School of Science, Northwestern Polytechnical University, Xi'an, 710072, P. R. China

**\*Corresponding Author**

E-mail Address: kongjie@nwpu.edu.cn (J.K.); Telephone (fax): +86-29-88431621

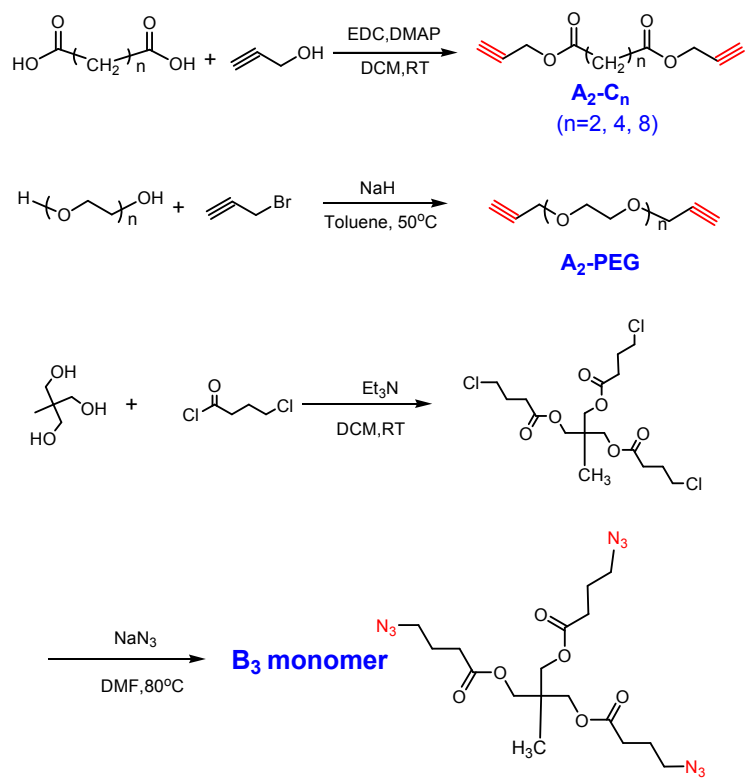

**Figure S1** Schematic synthesis of A<sub>2</sub>-C<sub>n</sub> (n=2, 4, 8), A<sub>2</sub>-PEG and B<sub>3</sub> monomers

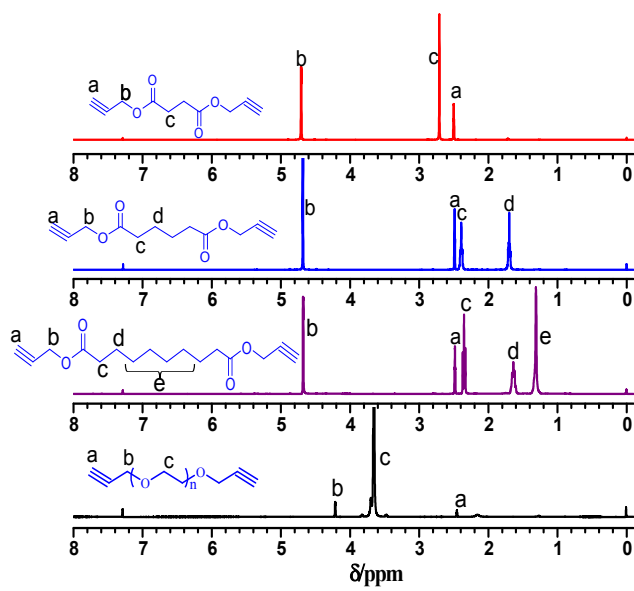

**Figure S2** <sup>1</sup>H NMR of A<sub>2</sub>-C<sub>2</sub>, A<sub>2</sub>-C<sub>4</sub>, A<sub>2</sub>-C<sub>8</sub> and A<sub>2</sub>-PEG monomers

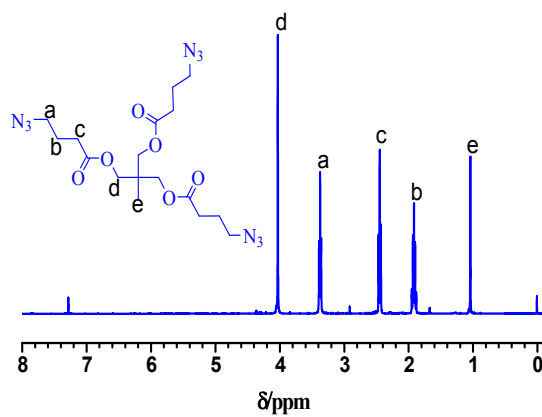

**Figure S3** <sup>1</sup>H NMR of B<sub>3</sub> monomer

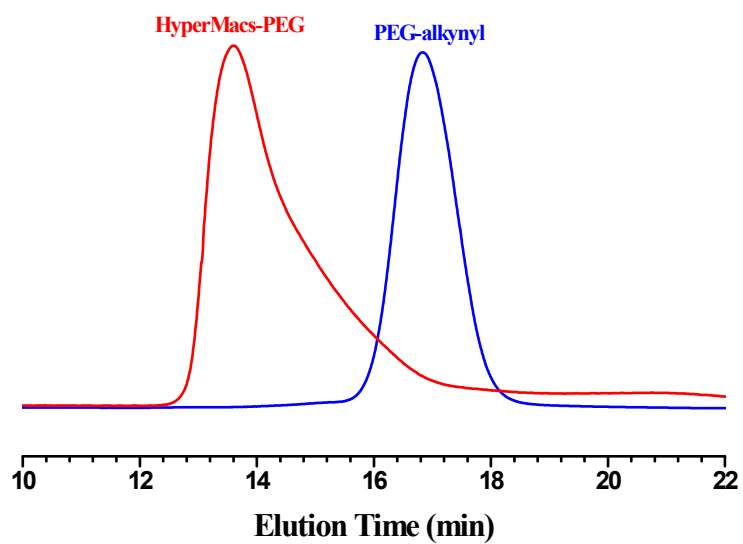

**Figure S4** SEC-MALLS curve of HyperMacs-PEG-polytriazoles and PEG-alkynyl at a flow rate of  $0.5 \text{ mL min}^{-1}$

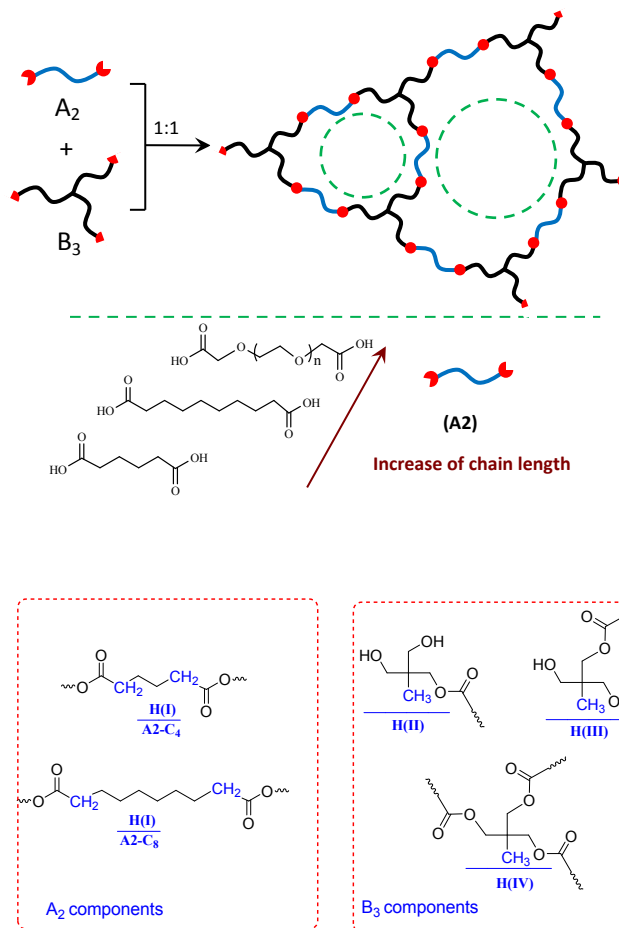

**Figure S5** Component units and correspondingly characteristic atoms in HyperMac (polyesters) from  $A_2+B_3$  step-wise polymerization

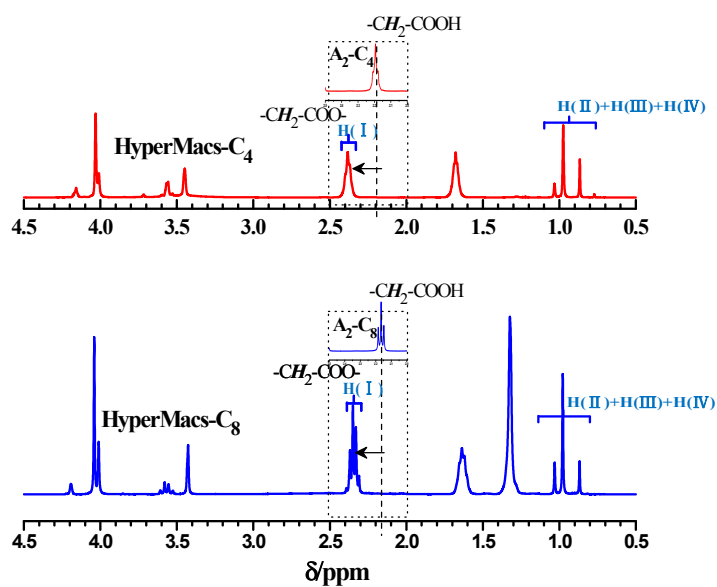

**Figure S6**  $^1\text{H}$  NMR spectra of HyperMacs- $\text{C}_4$  and  $\text{C}_8$  (polyesters) with different chain length backbones in  $\text{CDCl}_3$
